# Supplementary material
Source: MDPI journal article supplement (https://www.mdpi.com/2075-5309/13/1/22)
Supplement: s1 [file s1 › buildings-1973884-supplementary.pdf]

Table S1: Studies included in the literature review

| Study (title; author and year of publication/<br>disciplinary background; publication type)                                                                                                                                                       | Country<br>(origin/focus) | Purpose                                                                                                                                        | Sample (type; number; age<br>[mean/range/youth proportion*])                                                                                                                   | Study design                    | Main findings                                                                                                                                                                                                                                                                                                |
|---------------------------------------------------------------------------------------------------------------------------------------------------------------------------------------------------------------------------------------------------|---------------------------|------------------------------------------------------------------------------------------------------------------------------------------------|--------------------------------------------------------------------------------------------------------------------------------------------------------------------------------|---------------------------------|--------------------------------------------------------------------------------------------------------------------------------------------------------------------------------------------------------------------------------------------------------------------------------------------------------------|
| Health and wellbeing of Nepalese migrant workers abroad<br><br>Adhikary et al. 2018/ Health Sciences<br><br>Journal article                                                                                                                       | UK/India                  | Assessment of the health and mental well-being of Nepalese construction workers                                                                | Male migrant Nepalese construction workers in Malaysia, Qatar, and Saudi Arabia<br><br>N=403<br><br>Age: range (20-58 years)/ 85.1%                                            | Quantitative (cross-sectional)  | Social support: Migrants from low-income countries working in other low- or middle-income countries have to depend on largely on informal networks                                                                                                                                                           |
| Report on the construction industry apprentices’ focus groups<br><br>AISRAP 2018/ Health Sciences<br><br>Industry/organizational report                                                                                                           | Australia                 | Identify problems experienced by young people both in and outside of work, and the types of support required to help them during distress      | Young construction industry apprentices<br><br>N=57<br><br>Age: Not provided (discusses the case of young workers)                                                             | Qualitative (cross-sectional)   | Adopting strong CI culture: (i.e., hobbies like smoking, alcohol and substance abuse, gambling, going to the pub, keeping problems to oneself or sending them home, and being harsh/aggressive towards others)                                                                                               |
| Structural equation modeling of occupational stress in the construction industry<br><br>Bowen et al. 2014/Built Environment and Social Sciences<br><br>Journal article                                                                            | South Africa              | Assessment of stress and its impacts on the health of construction industry workers                                                            | Construction professionals (architects, civil engineers, quantity surveyors, and project and construction managers)<br><br>N=676<br><br>Age: range (25-50 years approximately) | Quantitative (cross-sectional)  | Determinants of coping strategies chosen include:<br><br>Past experiences with coping strategies<br>Support from close family and friends                                                                                                                                                                    |
| Improving mental health and wellbeing for young men in the building and construction industry.<br><br>Broadbent and Papadopoulos 2014/Education<br><br>Journal article                                                                            | Australia                 | Examination of programs for improving help-seeking behaviours and protective factors of young male construction workers in Australia.          | Young construction apprentices.<br><br>Qual (interviews: n=18)<br>Quan (self-reported survey: n=119)<br><br>Median age: 20 years; range: 18–22                                 | Mixed-methods (cross-sectional) | Determinant of coping choice:<br><br>Availability of externally sponsored workplace support program (i.e., informal peer mentoring)                                                                                                                                                                          |
| Exploring the relationship between psychological distress and likelihood of help seeking in construction workers: The role of talking to workmates and knowing how to get help.<br><br>Chapman et al. 2020/Health Sciences<br><br>Journal article | Australia                 | Examine the relationships between psychological distress and help seeking in Australian construction workers                                   | Male construction workers<br><br>N=511<br><br>Age: Not provided but discusses the case of young people                                                                         | Qual (cross-sectional)          | Getting help; confidence in talking to workmates<br><br>Controlling for age and ability to recognise personal signs of mental health problems, psychological distress negatively predicted likelihood of help seeking (partially mediated by knowing how to get help and confidence in talking to workmates) |
| Impact of individual resilience and safety climate on safety performance and psychological stress of construction workers: A case study of the Ontario construction industry<br><br>Chen et al. 2017/Built Environment<br><br>Journal article     | Canada                    | Examination of the role of safety climate and individual resilience in safety performance and job stress in the Canadian construction industry | Male construction workers employed in different sizes of firms (micro to large scale)<br><br>N=837<br><br>Age: mean 37.11 (SD=12); range (16-67 years)/ 69%                    | Quantitative (cross-sectional)  | Individual resilience: has a direct negative impact on psychological stress                                                                                                                                                                                                                                  |

|                                                                                                                                                                                                                               |                      |                                                                                                                                                                                      |                                                                                                                                                                                       |                                 |                                                                                                                                                                                                                                                                                                                                                                                                                                                                                                                              |
|-------------------------------------------------------------------------------------------------------------------------------------------------------------------------------------------------------------------------------|----------------------|--------------------------------------------------------------------------------------------------------------------------------------------------------------------------------------|---------------------------------------------------------------------------------------------------------------------------------------------------------------------------------------|---------------------------------|------------------------------------------------------------------------------------------------------------------------------------------------------------------------------------------------------------------------------------------------------------------------------------------------------------------------------------------------------------------------------------------------------------------------------------------------------------------------------------------------------------------------------|
| <p>Pain and prescription opioid use among US construction workers: Findings from the 2011-2018 medical expenditure panel survey</p> <p>Dong et al. 2022/ Built Environment</p> <p>Journal article</p>                         | USA                  | Examination of prescription opioid and nonopioid analgesic use and their relationship with pain conditions and sociodemographic factors                                              | <p>US construction workers</p> <p>N=11.5 million</p> <p>Age: range (16-55+ years)/ (16-34 years 35.3%)</p> <p>Specific discussion on the case of young construction workers</p>       | Quantitative (longitudinal)     | <p>Prescription opioid use</p> <p>Utilised by 10.4% of the population (approx. 1.2 million), of which 16.1% (193,200) were young construction workers (16-34 years)</p> <p>Usage increased with age and was higher among workers with poorer physical and mental health</p> <p>Young male construction workers were less likely to use prescription opioids than females and older construction workers</p> <p>Prescription opioid use among females was considerably higher (although forming a minority in the sample)</p> |
| <p>Overdose fatalities as worksites and opioid use in the construction industry</p> <p>Dong et al. 2019/Built Environment</p> <p>Industry/organizational report</p>                                                           | USA                  | Analysis of illicit drugs and prescribed opioid use overdose fatalities at construction worksites                                                                                    | <p>US construction workers</p> <p>N=11.5 million</p> <p>Age: range (65 years and below)/ (16-34 years 35.3%)</p> <p>Specific discussion on the case of young construction workers</p> | Quantitative (longitudinal)     | <p>Drug use overdose: medical drugs (prescribed and unprescribed), non-medical drugs, alcohol, other substances</p> <p>9x increase (7-65) from 2011-2018</p> <p>Younger construction workers were more likely (3x) to use illicit drugs, whereas older construction workers were more likely to use prescribed opioid pain relievers</p> <p>Overdose fatalities more likely among workers aged under 54 years, with younger works (35 years and below) accounting for at least 35% of deaths</p>                             |
| <p>A review of the evidence related to the impacts of and interventions for workplace bullying in the construction industry</p> <p>Doran et al. 2020/ Health Sciences</p> <p>Industry/organizational report</p>               | Australia/<br>Global | Examination of the impact of bullying on workplace (physical and mental) health and safety in the construction industry and interventions against bullying                           | <p>Published bullying literature on young construction workers in general</p> <p>N=44</p> <p>Age: Not provided but discusses the case of young people</p>                             | Systematic review               | <p>Cognitive rehearsal</p> <p>Exit, voice, acquiescence, neglect, and retribution</p> <p>The most effective strategies tend to be complementary rather than exclusive.</p>                                                                                                                                                                                                                                                                                                                                                   |
| <p>Alcohol and substance misuse in the construction industry</p> <p>Flannery et al. 2019/ Built Environment</p> <p>Journal article</p>                                                                                        | UK                   | Investigation of the factors contributing to the menace of alcohol and substance misuse (ASM) in the construction industry, and its mitigation                                       | <p>General construction workers and professionals</p> <p>N=18 (Qual)/ 142 (Quant)</p> <p>Age: Not provided but discusses the case of young people</p>                                 | Mixed methods (cross-sectional) | On-site workers use alcohol or substance abuse to improve their daily routines or numb the physical pain                                                                                                                                                                                                                                                                                                                                                                                                                     |
| <p>Coping Strategies Adopted by Construction Employees to Deal with the Causes and Effects of Occupational Psychological Disorders: A Study in Ghana</p> <p>Fordjour et al./2019/Built Environment</p> <p>Journal article</p> | Hong Kong/<br>Ghana  | Investigation of the coping strategies adopted by construction employees to deal with the causes and effects of occupational psychological disorders such as burnout and workaholism | <p>Construction trade workers and construction professionals</p> <p>N=90 (Qual)/ 300 (Quant)</p> <p>Age: range (25-55+ years)/ 23.3%</p>                                              | Mixed methods (cross-sectional) | <p>Professionals: delegating complicated tasks and seeking medical attention</p> <p>Trade workers: withdrawing from work duties /changing jobs and taking in more caffeinated drinks</p> <p>Avoiding the cause, altering the cause, adapting to the cause and accepting the cause</p>                                                                                                                                                                                                                                        |

|                                                                                                                                                 |                             |                                                                                                                                                                                                                                      |                                                                                                            |                                 |                                                                                                                                                                                                                          |
|-------------------------------------------------------------------------------------------------------------------------------------------------|-----------------------------|--------------------------------------------------------------------------------------------------------------------------------------------------------------------------------------------------------------------------------------|------------------------------------------------------------------------------------------------------------|---------------------------------|--------------------------------------------------------------------------------------------------------------------------------------------------------------------------------------------------------------------------|
| The state of youth health in Ghana’s construction industry                                                                                      | Ghana                       | Identification of the physical and mental conditions that affect young construction workers and measure their levels of prevalence, analysis of the influence of age and work location on young workers’ work-related mental health. | Young construction workers (professionals and tradeworkers base on-site and off-site.                      | Mixed methods (cross-sectional) | Coping strategies:<br><br>Alcohol and drug use, learning about health challenges, participation in religion, support from close friends and family<br><br>Influencing factors: socio-cultural and community attitudes    |
| Frimpong et al. 2022/Built Environment                                                                                                          |                             |                                                                                                                                                                                                                                      | Qual (interviews: n=21; focus groups: n=8)<br>Quan (self-reported survey: n=445)                           |                                 |                                                                                                                                                                                                                          |
| Industry/organizational report                                                                                                                  |                             |                                                                                                                                                                                                                                      | Age: 26.30 years (mean) (SD = 5.0)                                                                         |                                 |                                                                                                                                                                                                                          |
| FIFI/DIDO Mental Health Research Report 2013                                                                                                    | Australia                   | Identification of the stressors associated with FIFO work and the ways in which FIFO workers cope with these stressors. Identifications of services which would best meet the needs of FIFO workers                                  | FIFO/DIDO construction workers                                                                             | Mixed methods (cross-sectional) | Workers engaging in fewer non-effective coping behaviours compared to effective coping behaviours                                                                                                                        |
| Henry et al. 2013/ Social Sciences                                                                                                              |                             |                                                                                                                                                                                                                                      | N=18 (Qual)/ 924 (Quant)                                                                                   |                                 |                                                                                                                                                                                                                          |
| Industry/organizational report                                                                                                                  |                             |                                                                                                                                                                                                                                      | Age: Not provided; discusses the case of young people (about 80% of sample less than 49 years)             |                                 | Coping: withdrawing emotionally, ignoring personal needs, using alcohol, stimulant drinks, and/or illicit drugs, suppressing problems, and burying themselves in work, maintaining communication with family and friends |
| Factors Associated with Depression Among Male Casual Laborers in Urban Vietnam                                                                  | Vietnam+ Australia/ Vietnam | Examination of the level, the prevalence of and the factors associated with depression among male casual laborers in Hanoi                                                                                                           | Male causal labourers in urban Vietnam                                                                     | Quantitative (cross-sectional)  | Cohabitation with a peer, a friend or a new partner (loneliness, tedium or monotony associated with living far away from their families)                                                                                 |
| Huy et al. 2015/ Health sciences                                                                                                                |                             |                                                                                                                                                                                                                                      | N=450                                                                                                      |                                 |                                                                                                                                                                                                                          |
| Journal article                                                                                                                                 |                             |                                                                                                                                                                                                                                      | Age: 39.23 years (mean) (SD = 10.29); range (18-59 years)                                                  |                                 |                                                                                                                                                                                                                          |
| Are Young Men Getting the Message? Age Differences in Suicide Prevention Literacy among Male Construction Workers                               | Australia                   | Examination of age differences in help-seeking among male construction workers; and age differences in response to a workplace suicide prevention program                                                                            | Young male construction workers                                                                            | Quantitative (cross-sectional)  | On-site managerial onsite and office environments prefer formal workplace sources of coping.                                                                                                                             |
| King et al. 2019/ Health Sciences                                                                                                               |                             |                                                                                                                                                                                                                                      | N=19917                                                                                                    |                                 |                                                                                                                                                                                                                          |
| Journal Article                                                                                                                                 |                             |                                                                                                                                                                                                                                      | Age: range (15-35 years) 46.50%.<br>More than half aged 25-44 years                                        |                                 | On-site manual workers have low preference for formal workplace sources of coping. They prefer to cope by keeping things inward                                                                                          |
| Development of a mindfulness–stress–performance model for construction workers                                                                  | Hong Kong                   | Investigation of the effect of individual mindfulness characteristics on construction workers’ stress and performance                                                                                                                | Construction trade workers                                                                                 | Quantitative (cross-sectional)  | Inappropriate coping behaviours can lead to the generation of various stress symptoms                                                                                                                                    |
| Leung et al. 2016/ Built Environment                                                                                                            |                             |                                                                                                                                                                                                                                      | N=90                                                                                                       |                                 |                                                                                                                                                                                                                          |
| Journal article                                                                                                                                 |                             |                                                                                                                                                                                                                                      | Age: range (20-50+ years)/ 52.2% under 39 years                                                            |                                 | Mindfulness: observation (objective stress); observation and awareness (emotional stress); and physical stress is reduced by awareness                                                                                   |
| Depression in Australian Undergraduate Construction Management, Civil Engineering, and Architecture Students: Prevalence, Symptoms, and Support | Australia                   | Investigation of the prevalence, symptoms, and support for depression in undergraduate construction management, architecture, and civil engineering students                                                                         | Construction management, civil engineering, and architecture students enrolled in an Australian university | Quantitative (cross-sectional)  | Students have relatively underdeveloped coping mechanisms                                                                                                                                                                |
| Loosemore et al. 2020/ Built Environment                                                                                                        |                             |                                                                                                                                                                                                                                      | N=135                                                                                                      |                                 | Coping strategies: reducing study or work hours) are employed by students at both ends of the study/work spectrum; reliance on social connections                                                                        |
| Journal article                                                                                                                                 |                             |                                                                                                                                                                                                                                      | Age: range (18-24+ years)                                                                                  |                                 |                                                                                                                                                                                                                          |
| Young workers and mental health: A systematic review of the effect of employment and transition into employment on mental health                | Australia                   | Review of current research on the effects of employment on the mental health of young people                                                                                                                                         | General youth population below 30 years                                                                    | Systematic review               | Avoidant coping, typified by passivity, failure expectations, and internal attributions of failure                                                                                                                       |
| Milner et al. 2019/ Health Sciences                                                                                                             |                             |                                                                                                                                                                                                                                      | N=47                                                                                                       |                                 |                                                                                                                                                                                                                          |
| Industry/organizational report                                                                                                                  |                             |                                                                                                                                                                                                                                      | Age: Exclusive focus on the case of young construction workers                                             |                                 | Coping also included adaptive achievement strategies (including realistic expectations of success and adaptive coping)                                                                                                   |

|                                                                                                               |           |                                                                                                                                                                                                              |                                                                                                        |                                 |                                                                                                                                                                                                  |
|---------------------------------------------------------------------------------------------------------------|-----------|--------------------------------------------------------------------------------------------------------------------------------------------------------------------------------------------------------------|--------------------------------------------------------------------------------------------------------|---------------------------------|--------------------------------------------------------------------------------------------------------------------------------------------------------------------------------------------------|
| Construction workers’ alcohol use, knowledge, perceptions of risk and workplace norms                         | Australia | Investigation of the patterns, prevalence, and predictors of risky drinking among construction workers                                                                                                       | Male construction workers in Australia                                                                 | Quantitative (cross-sectional)  | Alcohol may not necessarily be a coping mechanism for stress                                                                                                                                     |
| Roche et al. 2020/ Health Sciences                                                                            |           |                                                                                                                                                                                                              | N=511                                                                                                  |                                 | Although job stress was positively correlated with AUDIT-C scores, it was not found to be a significant predictor of drinking, stress was not a primary driver of alcohol                        |
| Journal article                                                                                               |           |                                                                                                                                                                                                              | Age: range (15-68 years); mean = 35.1 years; 57.60%                                                    |                                 |                                                                                                                                                                                                  |
| Male and female mental health differences in built environment undergraduates                                 | Australia | Exploring sex differences in mental health and resilience in the early career pipeline of emerging built environment (BE) professionals                                                                      | First and final year BE undergraduate students                                                         | Quantitative (cross-sectional)  | Individual resilience acts as an important protective factor in fostering student mental health                                                                                                  |
| Scott-Young et al. 2020/ Built Environment                                                                    |           |                                                                                                                                                                                                              | N=384                                                                                                  |                                 | Females entering construction degrees are already primed to expect a tough study and work environment and may self-select into this career                                                       |
| Journal article                                                                                               |           |                                                                                                                                                                                                              | Age: range (18-24 years)                                                                               |                                 |                                                                                                                                                                                                  |
| Using a stress audit: The construction site manager experience in the UK                                      | UK        | Conducting a stress audit among construction industry site managers as a precursor to a stress management intervention programme                                                                             | Middle-aged construction managers                                                                      | Mixed methods (cross-sectional) | Workers engage in maladaptive coping behaviours such as cigarette smoking, alcohol consumption, absenteeism and certain physiological and biochemical measures (response to stress and pressure) |
| Sutherland and Davidson 1993/ Business Management                                                             |           |                                                                                                                                                                                                              | N=36 (Qual)/ 561 (Quant)                                                                               |                                 |                                                                                                                                                                                                  |
| Journal article                                                                                               |           |                                                                                                                                                                                                              | Age: range (19-above 60 years); 37% below 36 years                                                     |                                 |                                                                                                                                                                                                  |
| The social contexts of drinking among Irish men in London                                                     | UK        | Exploration of health beliefs and behaviors that cause alcohol use among middle-aged Irish men and their implications for the issue of alcohol misuse and mental health among younger Irish groups in the UK | Young Irish men undertaking construction work in Britain                                               | Qualitative (cross-sectional)   | Alcohol may be used to cope with physical pain or depression, to bolster self-esteem and deal with the emasculating effects of physical incapacity, economic inactivity or both                  |
| Tilki 2006/ Health Sciences and Social Sciences                                                               |           |                                                                                                                                                                                                              | Sample size and age not mentioned; discussion is applied exclusively to the case of young people       |                                 | Excessive drinking of alcohol is used as a coping mechanism by young people dealing with institutional and family abuse                                                                          |
| Journal article                                                                                               |           |                                                                                                                                                                                                              |                                                                                                        |                                 |                                                                                                                                                                                                  |
| A qualitative study of factors affecting mental health amongst low-income working mothers in Bangalore, India | India     | Exploration of the relationship between work, caring for family, spousal support, stress relief strategies and mental health amongst working mothers                                                         | Low-income working mothers working in construction and residing in urban slums across Bangalore, India | Qualitative (cross-sectional)   | Mitigating factors include social and financial support from family, friends and colleagues and the distraction or fulfilment of work (anxiety and depression)                                   |
| Travasso et al. 2014/ Health Sciences                                                                         |           |                                                                                                                                                                                                              | N=12 (construction sub-sample)                                                                         |                                 |                                                                                                                                                                                                  |
| Journal article                                                                                               |           |                                                                                                                                                                                                              | Age: range (20-35 years); mean = 25 years                                                              |                                 |                                                                                                                                                                                                  |
| Work–life fit: identification of demand and resource typologies within a systems framework                    | Australia | Explore Australian construction workers’ experience of demands and resources                                                                                                                                 | Construction workers in medium-sized contract-based construction organizations in Australia.           | Mixed-methods (cross-sectional) | Determinant of coping choice:                                                                                                                                                                    |
| Turner and Lingard 2016/ Built Environment                                                                    |           |                                                                                                                                                                                                              | N=59                                                                                                   |                                 | Availability of support (resources) from family, close friends, and community                                                                                                                    |
| Journal article                                                                                               |           |                                                                                                                                                                                                              | Age: mean = 35.49 years                                                                                |                                 |                                                                                                                                                                                                  |

**Note:** \*Percentages represent the minimum proportions of young workers in a sample.

**Abbreviations:**

AISRAP: Australian Institute for Suicide Research and Prevention. N: sample size. AUDIT-C: Alcohol Use Disorders Identification Test – Concise. FIFO: Fly-in-fly-out. DIDO: Drive-in-drive-out. Qual: Qualitative. Quan: Quantitative.
